# Supplementary material
Source: bioRxiv or medRxiv preprint supplement (https://medrxiv.org/highwire/filestream/68859/field_highwire_adjunct_files/0/19005116-1.pdf)
Supplement: Supplementary file [file 19005116-1.pdf]

## Epigenome-wide association study of seizures in childhood and adolescence

### Supplemental info

Doretta Caramaschi, PhD<sup>1,2</sup> \*, Charlie Hatcher, MSc<sup>1,2</sup>, Rosa H. Mulder, MSc<sup>3,4,5</sup>, Janine F. Felix, PhD<sup>5,6</sup>, Charlotte A. M. Cecil, PhD<sup>4,6</sup>, Caroline L. Relton, PhD<sup>1,2</sup>, Esther Walton, PhD<sup>1,2,8</sup>.

<sup>1</sup> Bristol Medical School, Population Health Sciences, University of Bristol, UK

<sup>2</sup> Medical Research Council Integrative Epidemiology Unit, University of Bristol, UK

<sup>3</sup> Institute of Education and Child Studies, Leiden University, The Netherlands

<sup>4</sup> Department of Child and Adolescent Psychiatry/Psychology, Erasmus MC, University Medical Center Rotterdam, Rotterdam, The Netherlands

<sup>5</sup> Generation R Study Group, Erasmus MC, University Medical Center Rotterdam, Rotterdam, The Netherlands

<sup>6</sup> Department of Pediatrics, Erasmus MC, University Medical Center Rotterdam, Rotterdam, the Netherlands

<sup>7</sup> Department of Epidemiology, Erasmus MC, University Medical Center Rotterdam, Rotterdam, The Netherlands

<sup>8</sup> Department of Psychology, University of Bath, UK

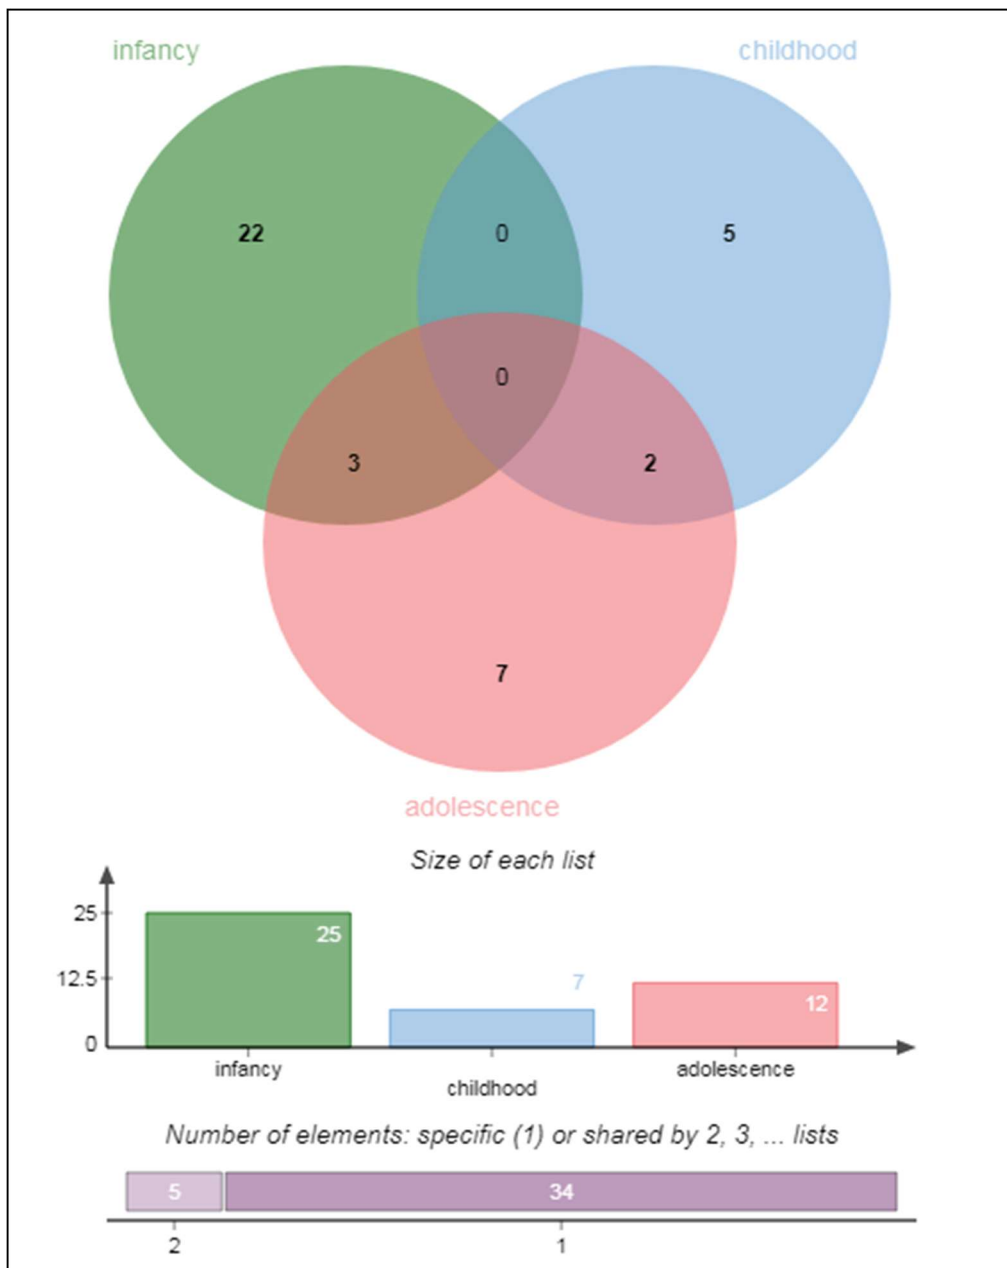

**SM Figure 1.** Overlap of cases across time points.

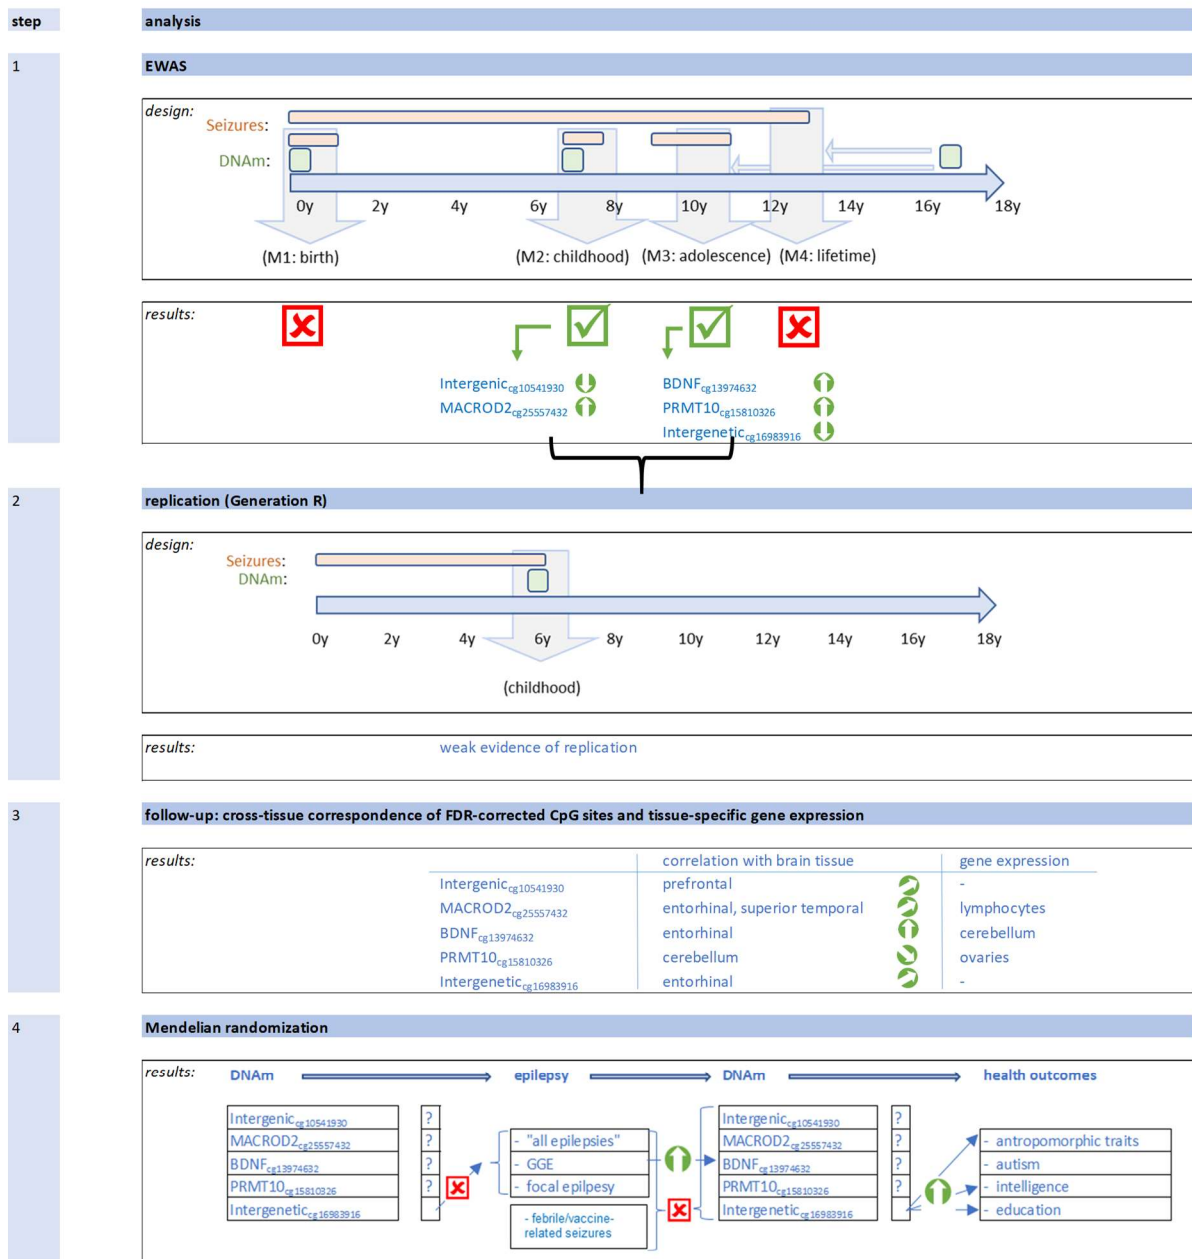

**SM Figure 2.** Overview of results. Epilepsy was chosen as a trait (rather than seizures) due to the availability of GWAS summary data on epilepsy based on UK Biobank, International League Against Epilepsy Consortium on Complex Epilepsies as well as febrile and MMR-vaccine-related seizures. Covariates used in each model (SV=surrogate variable):  
 M1: age + sex + birthweight + gestational age + maternal smoking + maternal education + nucleated red blood cells + granulocytes + monocytes + natural killer cells + B cells + CD4(+)T cells + CD8(+)T cells + SV1 + ... + SV15  
 M2: age + sex + maternal smoking + maternal education + granulocytes + monocytes + natural killer cells + B cells + CD4(+)T cells + CD8(+)T cells + SV1 + ... + SV13

M3: age + sex + maternal smoking + maternal education + granulocytes + monocytes + natural killer cells + B cells + CD4(+)T cells + CD8(+)T cells + SV1 + ... + SV14

M4: age + sex + maternal smoking + maternal education + granulocytes + monocytes + natural killer cells + B cells + CD4(+)T cells + CD8(+)T cells + SV1 + ... + SV14

M2 (Generation R): age + sex + maternal smoking + maternal education + granulocytes + monocytes + natural killer cells + B cells + CD4(+)T cells + CD8(+)T cells + SV1 + ... + SV13

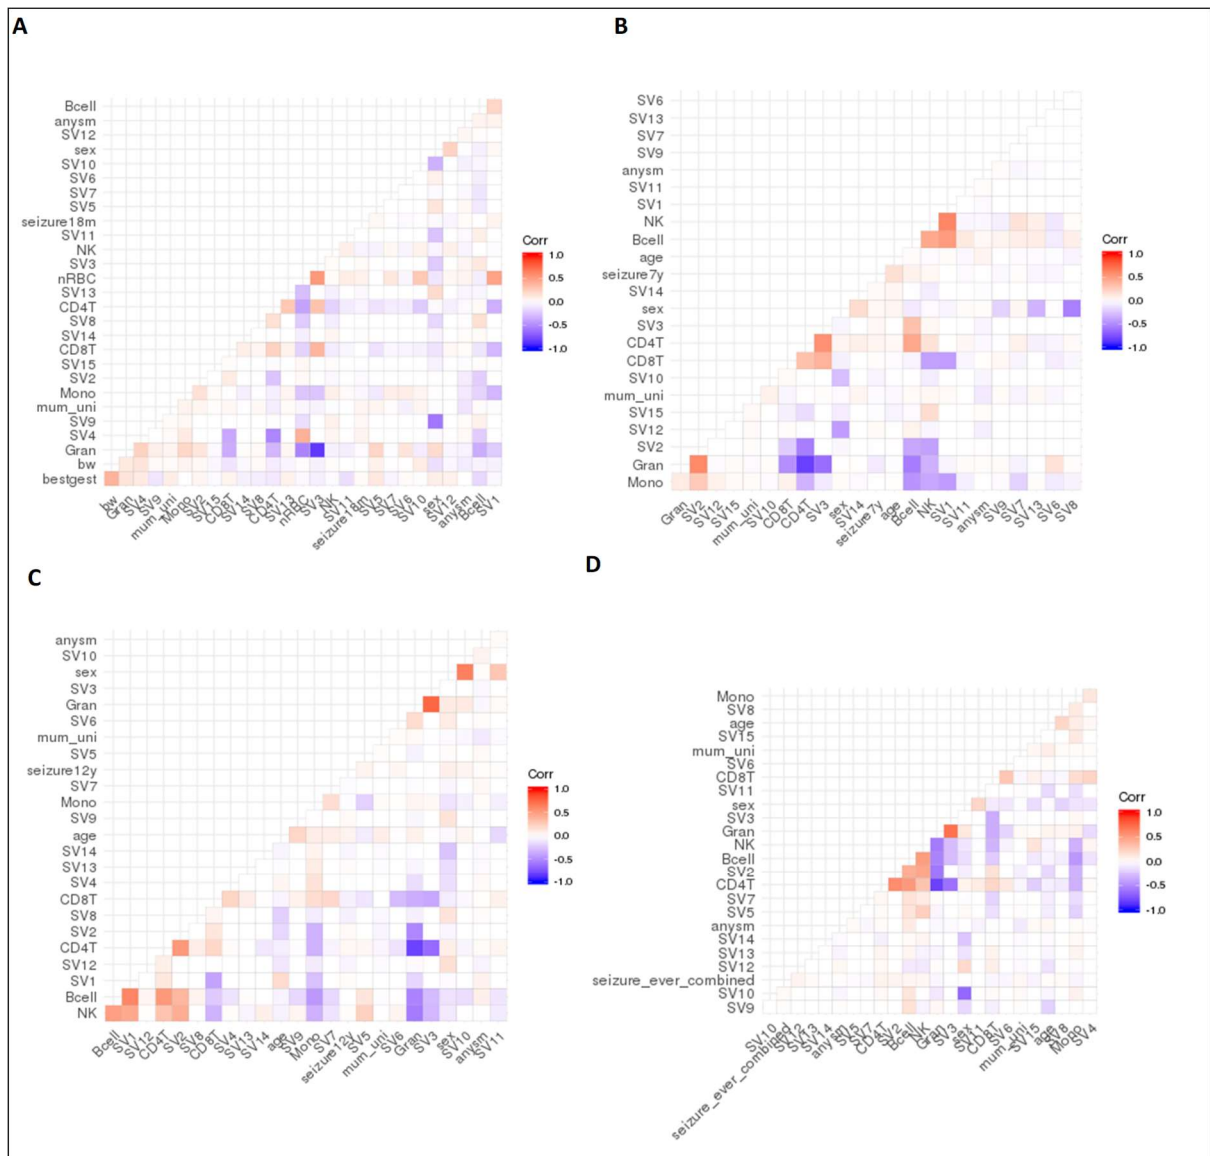

**SM Figure 3.** Plots displaying bivariate correlations between all variables included in the final models: (A) at birth, (B) during childhood and (C-D) adolescence (cross-sectional and lifetime seizure exposure, respectively).

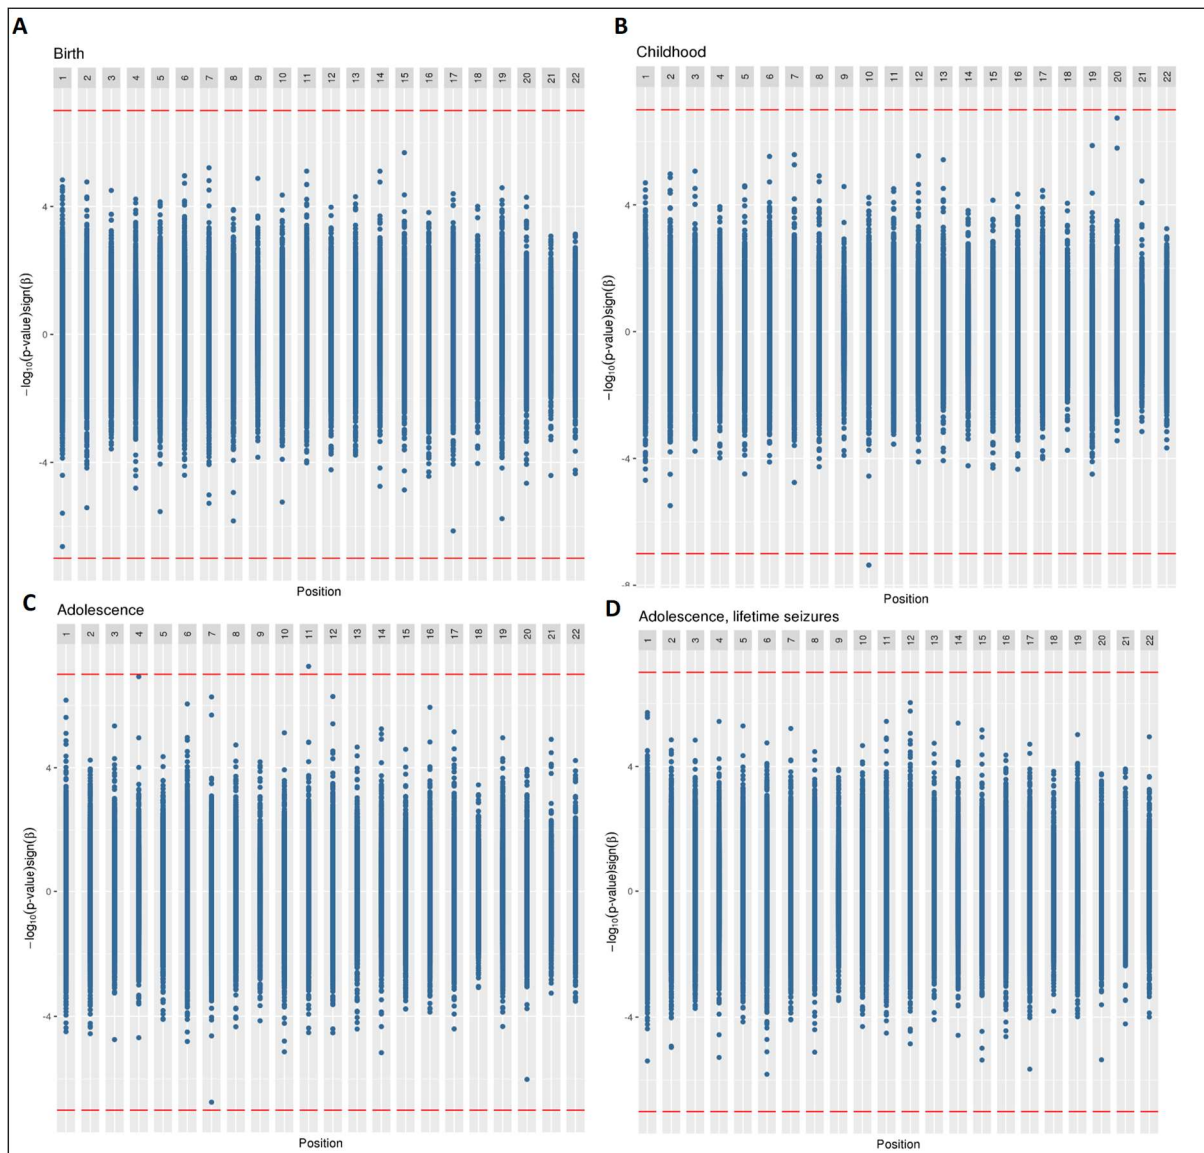

**SM Figure 4.** Miami plots displaying EWAS results: (A) at birth, (B) during childhood and (C-D) adolescence (cross-sectional and lifetime seizure exposure, respectively). Positive values on y-axis indicate  $-\log(P\text{-values})$  of hypermethylated sites, whereas negative values on the y-axis indicate  $-\log(P\text{-values})$  of hypomethylated sites (the sign of the y-axis values have been changed to reflect this). Bonferroni cut-off line in red.

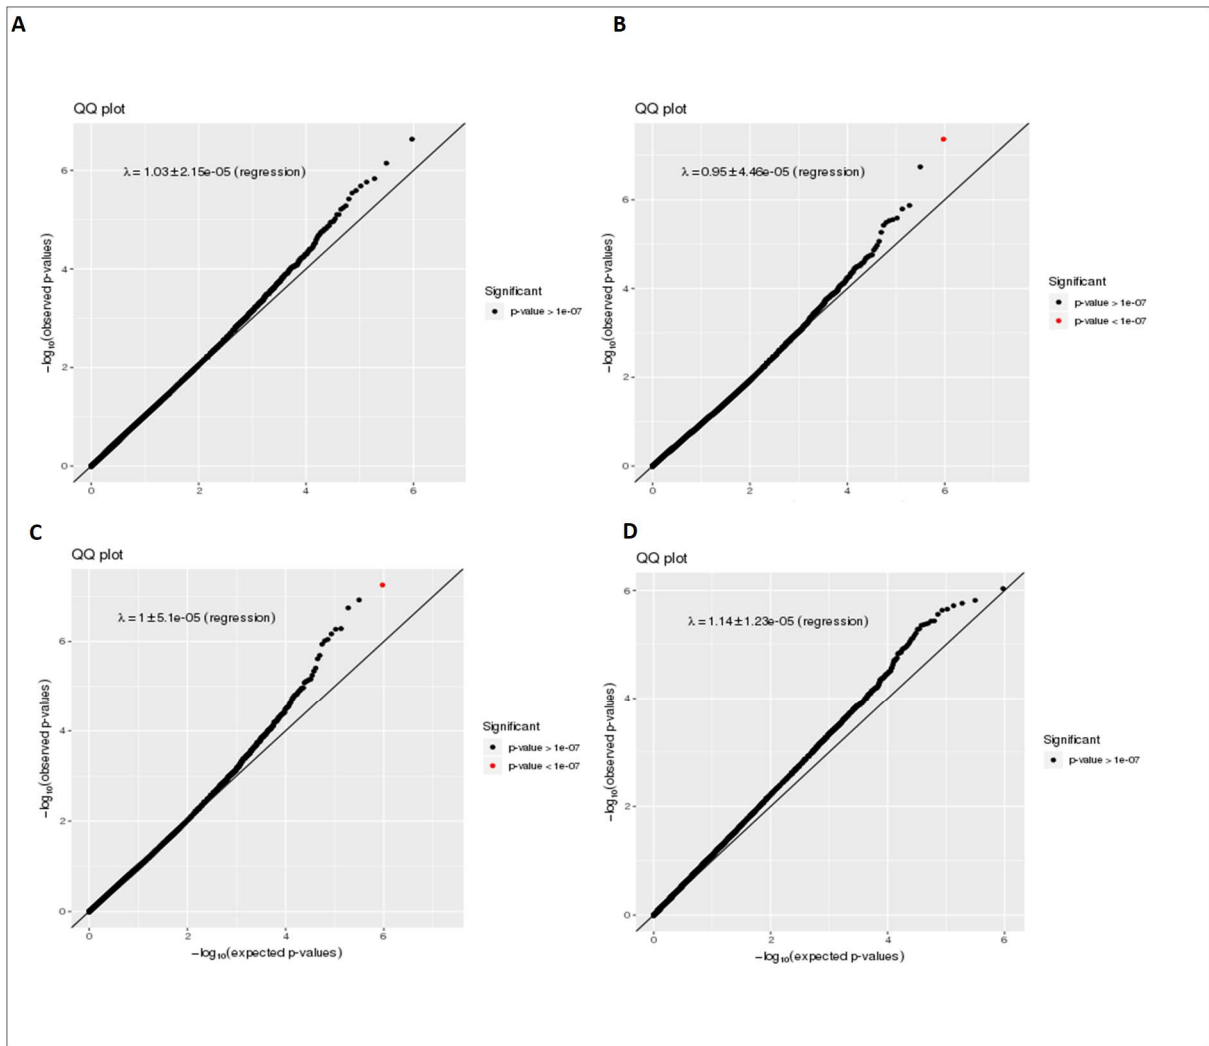

**SM Figure 5.** Quantile-quantile plots displaying potential test statistic inflation in the final models (A) at birth, (B) during childhood and (C-D) adolescence (cross-sectional and lifetime seizure exposure, respectively). Lambda was calculated using the regression method.

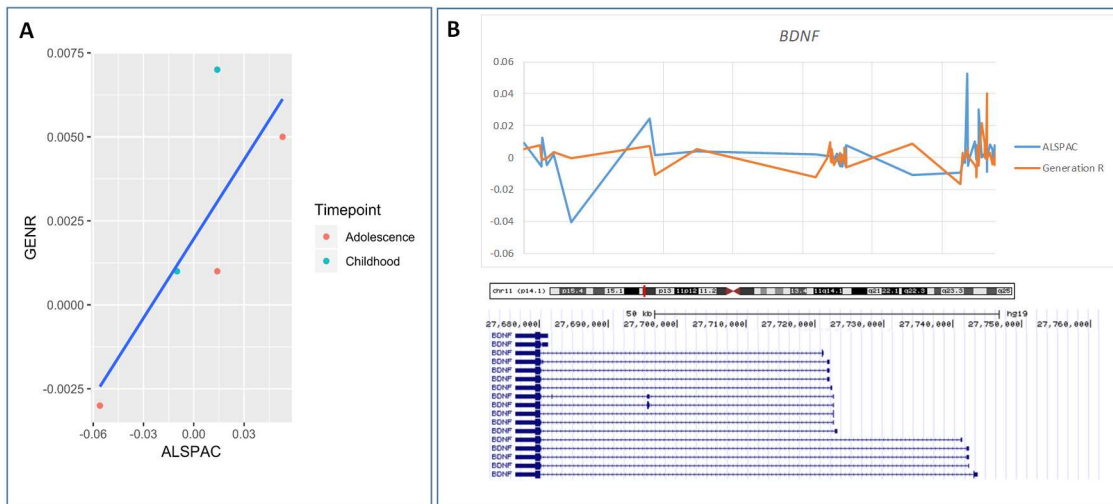

**SM Figure 6.** A) Regression betas in ALSPAC (x-axis) versus beta in Generation R (y-axis), plotted for the five most significant probes at each timepoint. B) Differences in DNA methylation according to experienced seizures in ALSPAC and Generation R (top panel) in the BDNF gene. The bottom panel shows the location of the transcripts of the different isoforms of the BDNF gene located on the reverse strand.



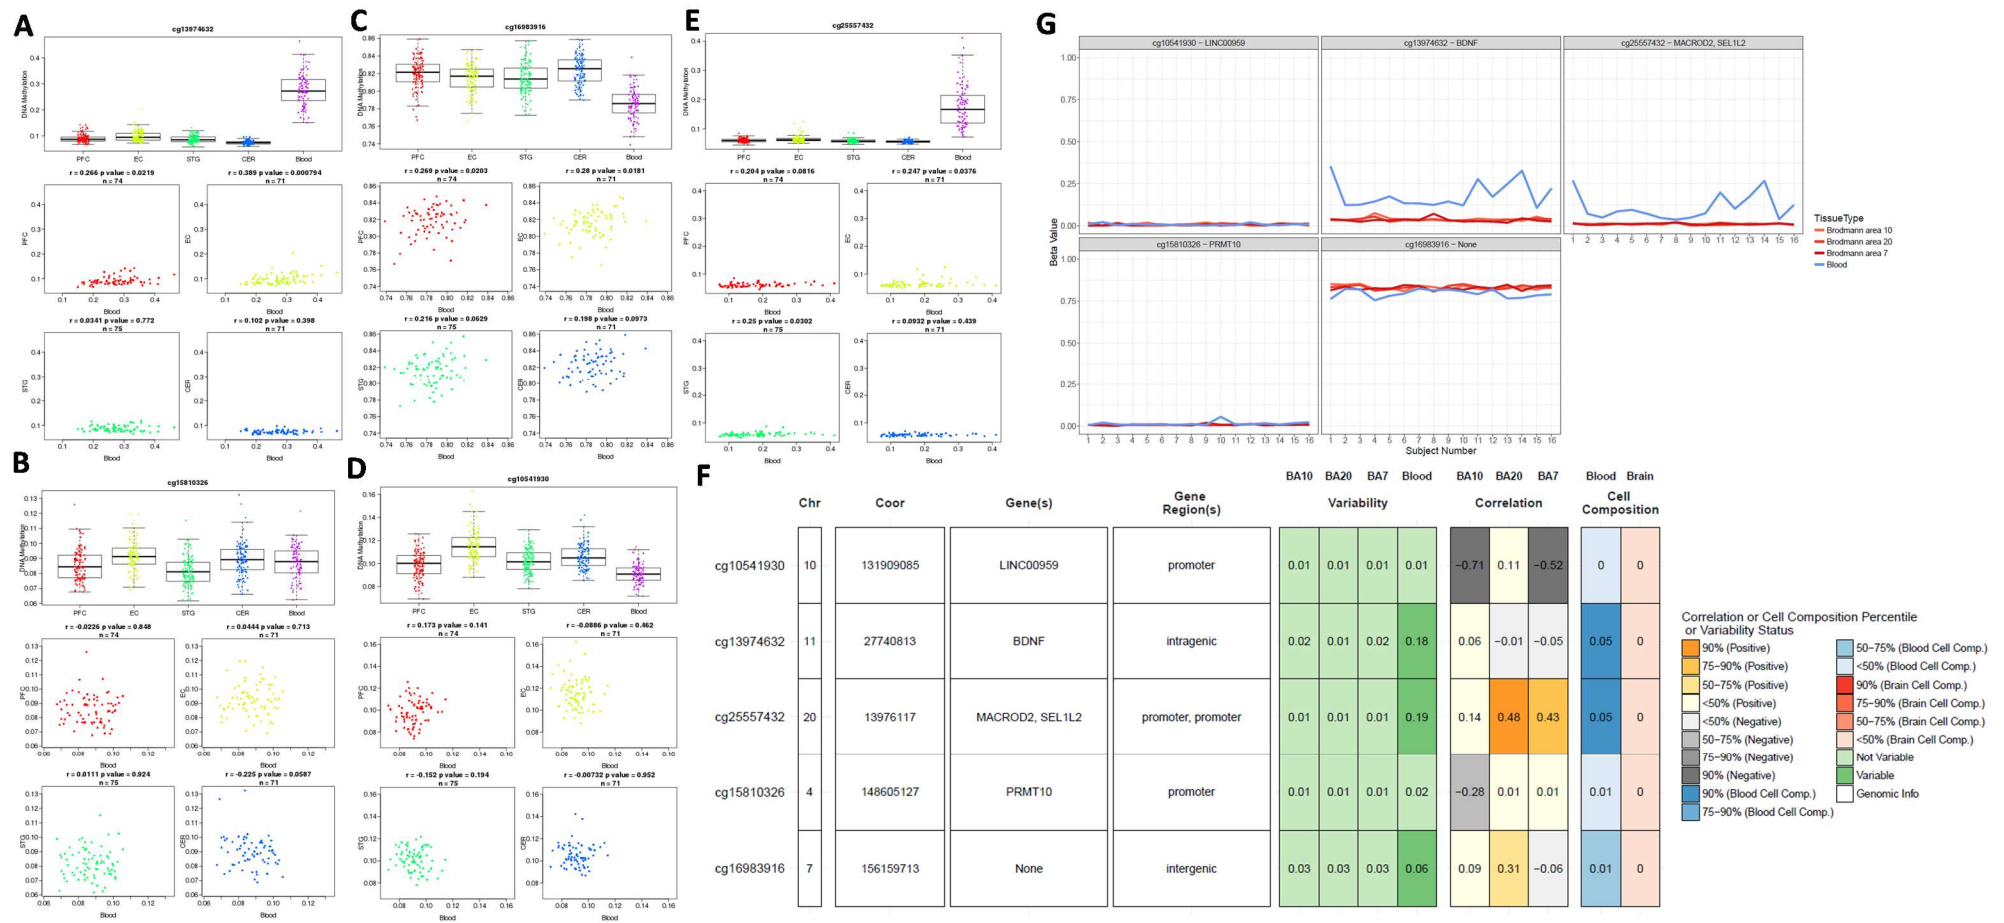

**SM Figure 7.** Cross-tissue correspondence of CpG sites, passing FDR correction in ALSPAC, based on data available at A-E)

<https://epigenetics.essex.ac.uk/bloodbrain> and F-G) <https://redgar598.shinyapps.io/BECon>. PFC = prefrontal cortex; STG = superior temporal gyrus; EC = entorhinal cortex; CER = cerebellum.

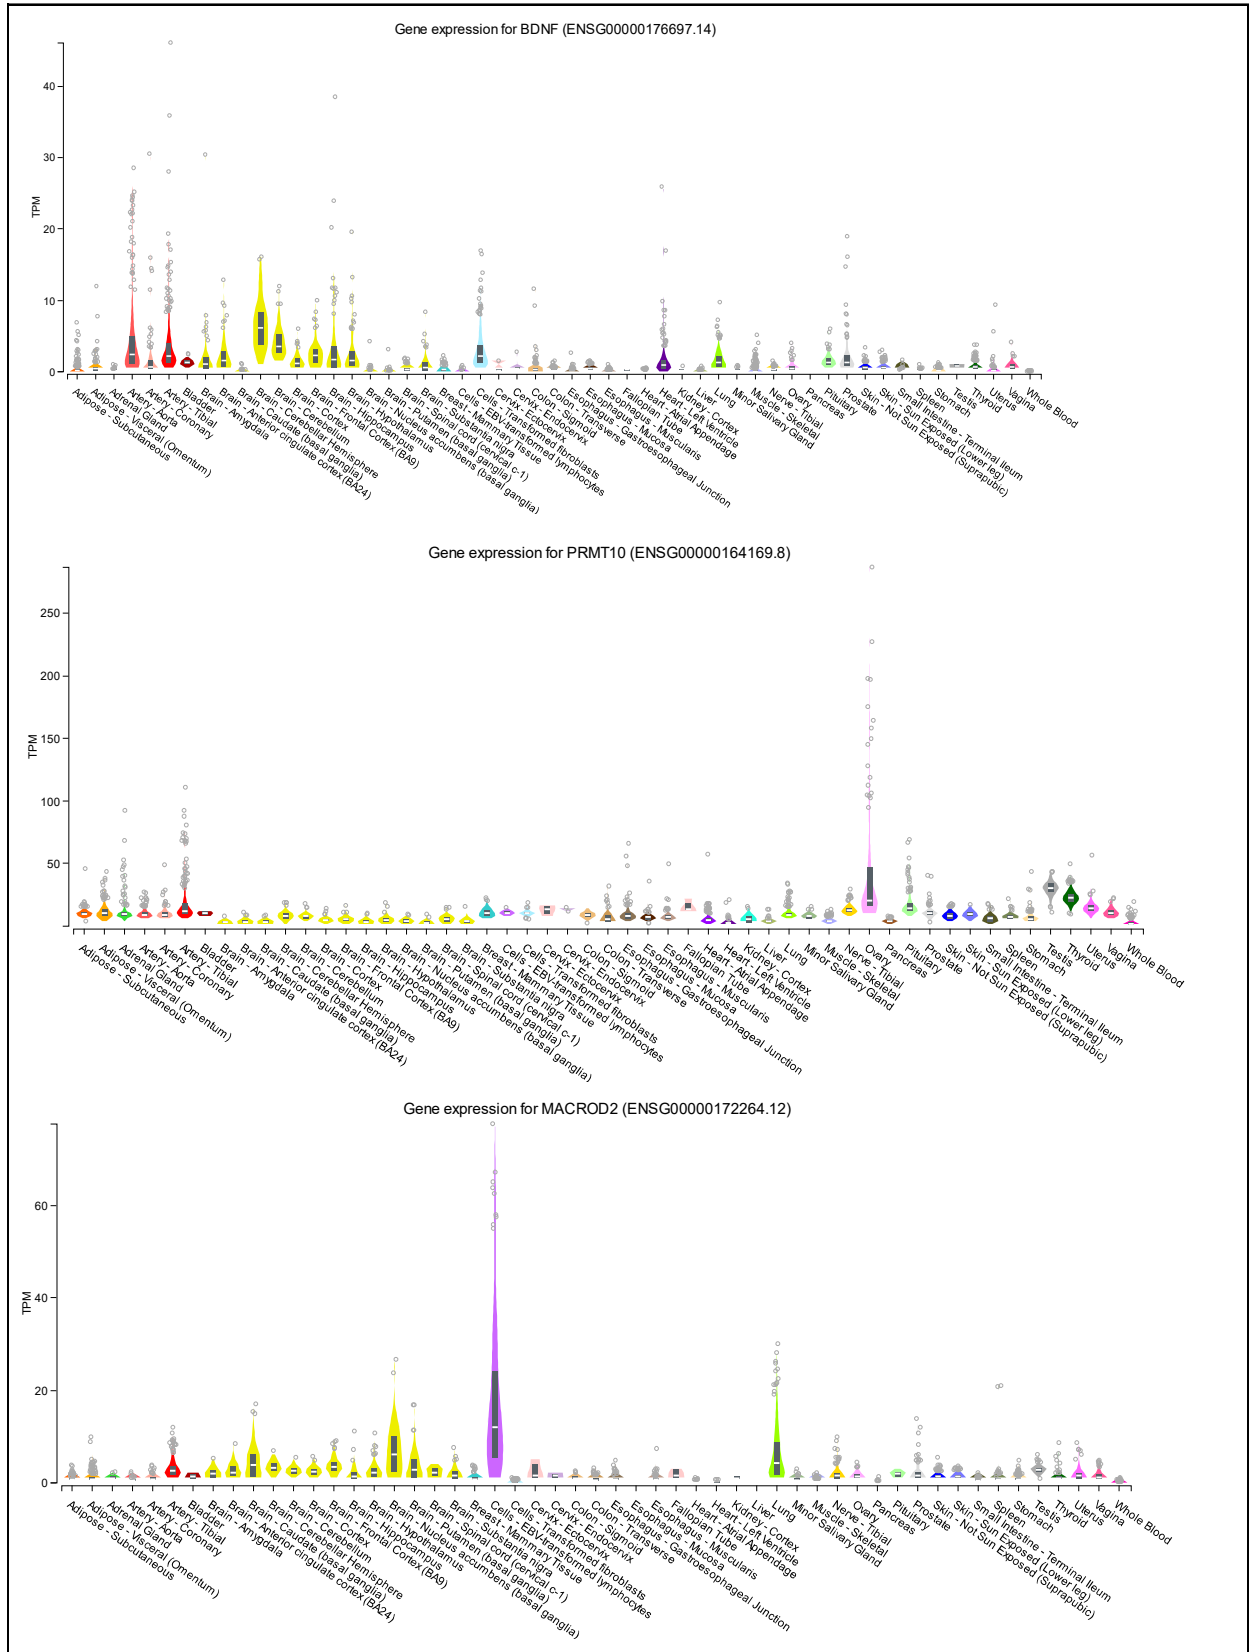

**SM Figure 8.** Tissue-specific expression of *BDNF*, *MACROD2* and *PRMT10*, based on data available at [www.gtexportal.org](http://www.gtexportal.org).

**SM Table 1.** Sample descriptives of Generation R.

| Characteristic                           | Generation R     |                  |                  |
|------------------------------------------|------------------|------------------|------------------|
|                                          | with seizures    | without seizures | total            |
| N                                        | 19               | 413              | 432              |
| Sex (%F)                                 | 42.1%            | 50.8%            | 50.5%            |
| Age at methylation in years (SD)         | 5.95 (0.15)      | 6.01 (0.30)      | 6.00 (0.29)      |
| Age at seizure assessment in years (SD)  | 6.11 (0.52)      | 6.01 (0.33)      | 6.01 (0.34)      |
| Birthweight in g (SD)                    | 3342.89 (544.36) | 3582.28 (491.02) | 3571.75 (495.24) |
| Gestational age in weeks (SD)            | 39.81 (1.62)     | 40.22 (1.46)     | 40.20 (1.46)     |
| Maternal smoking (% Yes)                 | 21.1%            | 19.9%            | 19.9%            |
| Maternal education (% University degree) | 31.6%            | 42.6%            | 42.1%            |

**SM Table 2.** Replication in Generation R and meta-analysis.

| INFO              |     |           |             | ALSPAC    |       |          |       |            | GenerationR |       |       | Meta-analysis |          |          |
|-------------------|-----|-----------|-------------|-----------|-------|----------|-------|------------|-------------|-------|-------|---------------|----------|----------|
| probeID           | CHR | MAPINFO   | timepoint   | BETA      | SE    | P_VAL    | FDR   | Bonferroni | BETA        | SE    | P_VAL | BETA          | SE       | P_VAL    |
| <b>FDR probes</b> |     |           |             |           |       |          |       |            |             |       |       |               |          |          |
| cg13974632        | 11  | 27740813  | Adolescence | 0.053     | 0.010 | 5.55E-08 | 0.026 | 0.026      | 0.005       | 0.006 | 0.356 | 0.018         | 0.005    | 5.79E-04 |
| cg15810326        | 4   | 148605127 | Adolescence | 0.014     | 0.003 | 1.19E-07 | 0.028 | 0.056      | 0.001       | 0.004 | 0.877 | 0.009         | 0.002    | 1.03E-04 |
| cg16983916        | 7   | 156159713 | Adolescence | -0.056    | 0.011 | 1.79E-07 | 0.028 | 0.084      | -0.003      | 0.005 | 0.487 | -0.012        | 0.005    | 7.98E-03 |
| cg10541930        | 10  | 131909085 | Childhood   | -0.010    | 0.002 | 4.32E-08 | 0.020 | 0.020      | 0.001       | 0.003 | 0.737 | -0.007        | 0.002    | 7.03E-05 |
| cg25557432        | 20  | 13976117  | Childhood   | 0.014     | 0.003 | 1.82E-07 | 0.043 | 0.086      | 0.007       | 0.005 | 0.145 | 0.012         | 0.003    | 2.34E-06 |
| <b>BDNF</b>       |     |           |             |           |       |          |       |            |             |       |       |               |          |          |
| cg06979684        | 11  | 27677125  | 27677125    | 0.009     | 0.019 | 0.623    | 1.000 | 1.000      | 0.005       | 0.007 | 0.451 | 0.006         | 0.007    | 0.404    |
| cg01418645        | 11  | 27679469  | 27679469    | -0.004    | 0.009 | 0.604    | 1.000 | 1.000      | 0.008       | 0.004 | 0.062 | 0.006         | 0.004    | 0.100    |
| cg08388004        | 11  | 27679632  | 27679632    | -0.005    | 0.007 | 0.429    | 1.000 | 1.000      | -0.001      | 0.003 | 0.878 | -0.002        | 0.003    | 0.557    |
| cg23426002        | 11  | 27679729  | 27679729    | 0.013     | 0.010 | 0.206    | 1.000 | 1.000      | -0.001      | 0.004 | 0.768 | 9.00E-04      | 0.004    | 0.802    |
| cg05189570        | 11  | 27680480  | 27680480    | -0.005    | 0.006 | 0.418    | 1.000 | 1.000      | -4.05E-04   | 0.005 | 0.934 | -0.002        | 0.004    | 0.594    |
| cg07238832        | 11  | 27681475  | 27681475    | 0.002     | 0.008 | 0.815    | 1.000 | 1.000      | 0.003       | 0.005 | 0.487 | 0.003         | 0.004    | 0.521    |
| cg14291693        | 11  | 27683959  | 27683959    | -0.040    | 0.013 | 0.002    | 0.787 | 1.000      | -2.73E-04   | 0.008 | 0.972 | -0.011        | 0.007    | 0.107    |
| cg15014679        | 11  | 27695210  | 27695210    | 0.024     | 0.014 | 0.083    | 1.000 | 1.000      | 0.007       | 0.007 | 0.327 | 0.010         | 0.006    | 0.097    |
| cg18354203        | 11  | 27696004  | 27696004    | 0.001     | 0.012 | 0.910    | 1.000 | 1.000      | -0.011      | 0.008 | 0.171 | -0.007        | 0.007    | 0.272    |
| cg18595174        | 11  | 27701991  | 27701991    | 0.004     | 0.012 | 0.741    | 1.000 | 1.000      | 0.005       | 0.007 | 0.427 | 0.005         | 0.006    | 0.433    |
| cg20108357        | 11  | 27718978  | 27718978    | 0.002     | 0.020 | 0.922    | 1.000 | 1.000      | -0.013      | 0.011 | 0.237 | -0.010        | 0.010    | 0.324    |
| cg09492354        | 11  | 27720709  | 27720709    | 0.001     | 0.002 | 0.597    | 1.000 | 1.000      | -2.97E-04   | 0.002 | 0.847 | 5.00E-04      | 0.001    | 0.724    |
| cg27193031        | 11  | 27721088  | 27721088    | 0.001     | 0.003 | 0.747    | 1.000 | 1.000      | 0.009       | 0.004 | 0.021 | 0.004         | 0.002    | 0.106    |
| cg25962210        | 11  | 27721222  | 27721222    | 3.98E-04  | 0.005 | 0.930    | 1.000 | 1.000      | -0.002      | 0.004 | 0.549 | -0.001        | 0.003    | 0.696    |
| cg15313332        | 11  | 27721270  | 27721270    | 0.004     | 0.001 | 0.007    | 0.931 | 1.000      | 0.002       | 0.002 | 0.390 | 0.004         | 9.00E-04 | 5.70E-05 |
| cg26057780        | 11  | 27721277  | 27721277    | 0.001     | 0.001 | 0.413    | 1.000 | 1.000      | 0.003       | 0.002 | 0.227 | 0.001         | 9.00E-04 | 0.118    |
| cg10558494        | 11  | 27721280  | 27721280    | 0.001     | 0.003 | 0.847    | 1.000 | 1.000      | -0.003      | 0.004 | 0.486 | -4.00E-04     | 0.002    | 0.855    |
| cg06260077        | 11  | 27721350  | 27721350    | 0.004     | 0.003 | 0.214    | 1.000 | 1.000      | 0.005       | 0.006 | 0.350 | 0.004         | 0.003    | 0.118    |
| cg20954537        | 11  | 27721668  | 27721668    | -0.001    | 0.002 | 0.522    | 1.000 | 1.000      | -0.005      | 0.003 | 0.135 | -0.002        | 0.002    | 0.180    |
| cg23947039        | 11  | 27722037  | 27722037    | 0.002     | 0.003 | 0.376    | 1.000 | 1.000      | -0.001      | 0.003 | 0.801 | 5.00E-04      | 0.002    | 0.814    |
| cg00298481        | 11  | 27722063  | 27722063    | -0.001    | 0.002 | 0.525    | 1.000 | 1.000      | -0.002      | 0.002 | 0.442 | -0.002        | 0.001    | 0.289    |
| cg07159484        | 11  | 27722066  | 27722066    | -4.63E-04 | 0.001 | 0.444    | 1.000 | 1.000      | -0.001      | 0.002 | 0.389 | -2.00E-04     | 9.00E-04 | 0.823    |
| cg017159484       | 11  | 27722523  | 27722523    | -0.005    | 0.003 | 0.062    | 1.000 | 1.000      | 0.003       | 0.004 | 0.455 | -0.002        | 0.002    | 0.377    |
| cg06025631        | 11  | 27722549  | 27722549    | 0.002     | 0.001 | 0.121    | 1.000 | 1.000      | -0.002      | 0.002 | 0.116 | 0.001         | 9.00E-04 | 0.180    |
| cg03984780        | 11  | 27722617  | 27722617    | 0.001     | 0.003 | 0.819    | 1.000 | 1.000      | -0.001      | 0.004 | 0.689 | 3.00E-04      | 0.002    | 0.907    |
| cg15710245        | 11  | 27722620  | 27722620    | -0.004    | 0.013 | 0.767    | 1.000 | 1.000      | 0.001       | 0.007 | 0.941 | -1.00E-04     | 0.006    | 0.984    |
| cg08362738        | 11  | 27722636  | 27722636    | -0.005    | 0.003 | 0.072    | 1.000 | 1.000      | -0.004      | 0.003 | 0.238 | -0.005        | 0.002    | 0.034    |
| cg25328597        | 11  | 27722638  | 27722638    | -0.005    | 0.003 | 0.125    | 1.000 | 1.000      | 0.001       | 0.003 | 0.787 | -0.002        | 0.002    | 0.346    |
| cg15914769        | 11  | 27722774  | 27722774    | 0.002     | 0.002 | 0.296    | 1.000 | 1.000      | -0.001      | 0.002 | 0.636 | 5.00E-04      | 0.001    | 0.724    |
| cg04672351        | 11  | 27722889  | 27722889    | -0.006    | 0.003 | 0.038    | 1.000 | 1.000      | -0.001      | 0.003 | 0.608 | -0.004        | 0.002    | 0.099    |
| cg09606766        | 11  | 27722971  | 27722971    | -0.001    | 0.002 | 0.613    | 1.000 | 1.000      | 0.001       | 0.003 | 0.652 | -4.00E-04     | 0.002    | 0.817    |
| cg20340655        | 11  | 27723075  | 27723075    | -3.05E-04 | 0.001 | 0.836    | 1.000 | 1.000      | 4.43E-04    | 0.002 | 0.832 | 0.000         | 9.00E-04 | 1.000    |
| cg11241206        | 11  | 27723128  | 27723128    | 3.42E-04  | 0.002 | 0.822    | 1.000 | 1.000      | -0.003      | 0.003 | 0.264 | -9.00E-04     | 0.002    | 0.579    |
| cg15688670        | 11  | 27723190  | 27723190    | -0.001    | 0.001 | 0.346    | 1.000 | 1.000      | -0.001      | 0.002 | 0.678 | -0.001        | 9.00E-04 | 0.264    |
| cg23497217        | 11  | 27723214  | 27723214    | 0.006     | 0.005 | 0.222    | 1.000 | 1.000      | 0.006       | 0.005 | 0.223 | 0.006         | 0.004    | 0.090    |
| cg05218375        | 11  | 27723218  | 27723218    | -0.002    | 0.009 | 0.842    | 1.000 | 1.000      | 0.001       | 0.007 | 0.871 | -1.00E-04     | 0.006    | 0.981    |
| cg06991510        | 11  | 27723237  | 27723237    | 0.001     | 0.001 | 0.368    | 1.000 | 1.000      | -0.001      | 0.002 | 0.561 | 6.00E-04      | 9.00E-04 | 0.502    |
| cg24377657        | 11  | 27723245  | 27723245    | -0.005    | 0.008 | 0.486    | 1.000 | 1.000      | 0.003       | 0.005 | 0.624 | 8.00E-04      | 0.004    | 0.859    |
| cg26840770        | 11  | 27723290  | 27723290    | -0.004    | 0.006 | 0.445    | 1.000 | 1.000      | 0.002       | 0.004 | 0.663 | 2.00E-04      | 0.003    | 0.963    |
| cg01636003        | 11  | 27723385  | 27723385    | -0.004    | 0.003 | 0.173    | 1.000 | 1.000      | 1.86E-04    | 0.003 | 0.956 | -0.002        | 0.002    | 0.346    |
| cg24065044        | 11  | 27723409  | 27723409    | 0.008     | 0.006 | 0.230    | 1.000 | 1.000      | -0.006      | 0.006 | 0.295 | 0.001         | 0.004    | 0.814    |
| cg11806762        | 11  | 27732958  | 27732958    | -0.011    | 0.017 | 0.515    | 1.000 | 1.000      | 0.009       | 0.009 | 0.355 | 0.005         | 0.008    | 0.561    |
| cg17413943        | 11  | 27739827  | 27739827    | -0.009    | 0.013 | 0.470    | 1.000 | 1.000      | -0.017      | 0.006 | 0.005 | -0.016        | 0.005    | 0.004    |
| cg05818894        | 11  | 27740078  | 27740078    | -0.004    | 0.003 | 0.240    | 1.000 | 1.000      | 0.003       | 0.003 | 0.336 | -5.00E-04     | 0.002    | 0.814    |
| cg21010859        | 11  | 27740161  | 27740161    | -0.001    | 0.002 | 0.543    | 1.000 | 1.000      | 0.002       | 0.003 | 0.572 | -1.00E-04     | 0.002    | 0.963    |
| cg04481212        | 11  | 27740495  | 27740495    | -0.003    | 0.002 | 0.115    | 1.000 | 1.000      | -0.001      | 0.004 | 0.794 | -0.003        | 0.002    | 0.146    |
| cg13974632        | 11  | 27740813  | 27740813    | 0.053     | 0.010 | 5.55E-08 | 0.026 | 0.026      | 0.005       | 0.006 | 0.356 | 0.018         | 0.005    | 5.79E-04 |
| cg05733135        | 11  | 27740876  | 27740876    | -0.005    | 0.005 | 0.246    | 1.000 | 1.000      | 0.002       | 0.004 | 0.602 | -7.00E-04     | 0.003    | 0.815    |
| cg22043168        | 11  | 27741077  | 27741077    | -0.001    | 0.005 | 0.907    | 1.000 | 1.000      | -2.98E-04   | 0.004 | 0.933 | -4.00E-04     | 0.003    | 0.901    |
| cg24650785        | 11  | 27741916  | 27741916    | 0.010     | 0.008 | 0.190    | 1.000 | 1.000      | -0.005      | 0.006 | 0.461 | 4.00E-04      | 0.005    | 0.934    |
| cg26949694        | 11  | 27742060  | 27742060    | -0.001    | 0.007 | 0.849    | 1.000 | 1.000      | -0.007      | 0.005 | 0.169 | -0.005        | 0.004    | 0.222    |
| cg25412831        | 11  | 27742138  | 27742138    | 0.008     | 0.008 | 0.329    | 1.000 | 1.000      | -0.012      | 0.006 | 0.038 | -0.005        | 0.005    | 0.317    |
| cg06816235        | 11  | 27742219  | 27742219    | -0.002    | 0.005 | 0.626    | 1.000 | 1.000      | -0.003      | 0.004 | 0.497 | -0.003        | 0.003    | 0.403    |
| cg01225698        | 11  | 27742355  | 27742355    | 0.004     | 0.008 | 0.557    | 1.000 | 1.000      | 0.008       | 0.007 | 0.288 | 0.006         | 0.005    | 0.234    |
| cg12448003        | 11  | 27742365  | 27742365    | -0.002    | 0.003 | 0.435    | 1.000 | 1.000      | -0.001      | 0.004 | 0.762 | -0.002        | 0.002    | 0.494    |
| cg06684850        | 11  | 27742369  | 27742369    | -0.005    | 0.009 | 0.570    | 1.000 | 1.000      | -5.97E-05   | 0.008 | 0.994 | -0.002        | 0.006    | 0.712    |
| cg10635145        | 11  | 27742435  | 27742435    | 0.007     | 0.019 | 0.705    | 1.000 | 1.000      | 0.005       | 0.014 | 0.744 | 0.006         | 0.011    | 0.613    |
| cg04106006        | 11  | 27742454  | 27742454    | 0.030     | 0.018 | 0.093    | 1.000 | 1.000      | -0.004      | 0.014 | 0.770 | 0.009         | 0.011    | 0.425    |
| cg07704699        | 11  | 27742832  | 27742832    | 2.06E-04  | 0.017 | 0.990    | 1.000 | 1.000      | 0.021       | 0.013 | 0.106 | 0.013         | 0.010    | 0.199    |
| cg27351358        | 11  | 27743258  | 27743258    | 0.003     | 0.003 | 0.349    | 1.000 | 1.000      | 0.009       | 0.005 | 0.093 | 0.005         | 0.003    | 0.074    |
| cg02527472        | 11  | 27743348  | 27743348    | 3.27E-04  | 0.003 | 0.906    | 1.000 | 1.000      | -8.60E-05   | 0.004 | 0.983 | 0.000         | 0.002    | 1.000    |
| cg01642653        | 11  | 27743476  | 27743476    | -0.001    | 0.003 | 0.801    | 1.000 | 1.000      | 0.005       |       |       |               |          |          |

**SM Table 3.** Two-sample MR analysis of the effect of DNA methylation on epilepsy (method=Wald ratio).

| CpG site (Exposure) | Disease (Outcome)                                                                     | N of SNPs | Beta      | (logodds SE) | P value | OR     |
|---------------------|---------------------------------------------------------------------------------------|-----------|-----------|--------------|---------|--------|
| cg16983916          | ICD10: G40.3 Generalised idiopathic epilepsy and epileptic syndromes                  | 1         | -9.83E-05 | 0.0002       | 0.5743  | 0.9999 |
| cg16983916          | ICD10: G40.9 Epilepsy, unspecified                                                    | 1         | 4.99E-04  | 0.0006       | 0.4013  | 1.0005 |
| cg16983916          | ICD10: G40.1 Localisation-related (focal) (partial) symptomatic epilepsy and epilepti | 1         | -9.48E-05 | 0.0001       | 0.2523  | 0.9999 |
| cg16983916          | ICD10: G40.2 Localisation-related (focal) (partial) symptomatic epilepsy and epilepti | 1         | -1.13E-04 | 0.0001       | 0.3737  | 0.9999 |
| cg16983916          | ICD10: G40.8 Other epilepsy                                                           | 1         | -2.73E-05 | 0.0001       | 0.6016  | 1.0000 |
| cg16983916          | ICD10: G40.1 Localisation-related (focal) (partial) symptomatic epilepsy and epilepti | 1         | -5.44E-05 | 0.0001       | 0.4631  | 0.9999 |
| cg16983916          | ICD10: G40.2 Localisation-related (focal) (partial) symptomatic epilepsy and epilepti | 1         | 7.40E-05  | 0.0001       | 0.5731  | 1.0001 |
| cg16983916          | ICD9: 3459 Epilepsy, unspecified                                                      | 1         | 8.71E-05  | 0.0001       | 0.2399  | 1.0001 |
| cg16983916          | ICD10: G40.3 Generalised idiopathic epilepsy and epileptic syndromes                  | 1         | -1.01E-05 | 0.0001       | 0.9427  | 1.0000 |

**SM Table 4.** Two-sample MR analysis of the effect of epilepsy on DNA methylation.

| Disease (Exposure) | CpG site (Outcome) | N of SNPs | Method                    | Beta   | SE    | P value |
|--------------------|--------------------|-----------|---------------------------|--------|-------|---------|
| All epilepsy       | cg16983916         | 4         | MR Egger                  | 0.276  | 1.154 | 0.834   |
| All epilepsy       | cg16983916         | 4         | Weighted median           | -0.070 | 0.168 | 0.678   |
| All epilepsy       | cg16983916         | 4         | Inverse variance weighted | -0.030 | 0.145 | 0.837   |
| All epilepsy       | cg16983916         | 4         | Simple mode               | -0.227 | 0.289 | 0.489   |
| All epilepsy       | cg16983916         | 4         | Weighted mode             | -0.234 | 0.256 | 0.429   |
| All epilepsy       | cg10541930         | 4         | MR Egger                  | -0.294 | 0.689 | 0.711   |
| All epilepsy       | cg10541930         | 4         | Weighted median           | -0.148 | 0.111 | 0.183   |
| All epilepsy       | cg10541930         | 4         | Inverse variance weighted | -0.136 | 0.102 | 0.181   |
| All epilepsy       | cg10541930         | 4         | Simple mode               | -0.161 | 0.163 | 0.397   |
| All epilepsy       | cg10541930         | 4         | Weighted mode             | -0.163 | 0.159 | 0.381   |
| All epilepsy       | cg15810326         | 4         | MR Egger                  | -0.352 | 0.575 | 0.603   |
| All epilepsy       | cg15810326         | 4         | Weighted median           | -0.033 | 0.098 | 0.734   |
| All epilepsy       | cg15810326         | 4         | Inverse variance weighted | -0.036 | 0.085 | 0.670   |
| All epilepsy       | cg15810326         | 4         | Simple mode               | -0.034 | 0.147 | 0.832   |
| All epilepsy       | cg15810326         | 4         | Weighted mode             | -0.023 | 0.153 | 0.891   |
| All epilepsy       | cg13974632         | 4         | MR Egger                  | -0.279 | 1.646 | 0.881   |
| All epilepsy       | cg13974632         | 4         | Weighted median           | -0.013 | 0.158 | 0.934   |
| All epilepsy       | cg13974632         | 4         | Inverse variance weighted | 0.139  | 0.202 | 0.490   |
| All epilepsy       | cg13974632         | 4         | Simple mode               | -0.078 | 0.280 | 0.798   |
| All epilepsy       | cg13974632         | 4         | Weighted mode             | -0.108 | 0.200 | 0.627   |
| All epilepsy       | cg25557432         | 4         | MR Egger                  | -0.210 | 1.173 | 0.874   |
| All epilepsy       | cg25557432         | 4         | Weighted median           | 0.148  | 0.211 | 0.482   |
| All epilepsy       | cg25557432         | 4         | Inverse variance weighted | 0.143  | 0.173 | 0.408   |
| All epilepsy       | cg25557432         | 4         | Simple mode               | 0.240  | 0.280 | 0.455   |
| All epilepsy       | cg25557432         | 4         | Weighted mode             | 0.234  | 0.284 | 0.470   |
| Focal epilepsy     | cg16983916         | 1         | Wald ratio                | -0.337 | 0.297 | 0.256   |
| Focal epilepsy     | cg10541930         | 1         | Wald ratio                | -0.249 | 0.208 | 0.231   |
| Focal epilepsy     | cg15810326         | 1         | Wald ratio                | -0.204 | 0.173 | 0.239   |
| Focal epilepsy     | cg13974632         | 1         | Wald ratio                | -0.304 | 0.235 | 0.195   |
| Focal epilepsy     | cg25557432         | 1         | Wald ratio                | 0.127  | 0.354 | 0.719   |
| GGE                | cg16983916         | 3         | MR Egger                  | 0.050  | 1.129 | 0.972   |
| GGE                | cg16983916         | 3         | Weighted median           | 0.128  | 0.151 | 0.396   |
| GGE                | cg16983916         | 3         | Inverse variance weighted | 0.110  | 0.128 | 0.394   |
| GGE                | cg16983916         | 3         | Simple mode               | 0.210  | 0.203 | 0.409   |
| GGE                | cg16983916         | 3         | Weighted mode             | 0.163  | 0.178 | 0.455   |
| GGE                | cg10541930         | 3         | MR Egger                  | 1.645  | 0.519 | 0.194   |
| GGE                | cg10541930         | 3         | Weighted median           | 0.083  | 0.126 | 0.509   |
| GGE                | cg10541930         | 3         | Inverse variance weighted | 0.073  | 0.184 | 0.691   |
| GGE                | cg10541930         | 3         | Simple mode               | 0.023  | 0.210 | 0.924   |
| GGE                | cg10541930         | 3         | Weighted mode             | 0.160  | 0.171 | 0.449   |
| GGE                | cg15810326         | 3         | MR Egger                  | 0.177  | 0.701 | 0.843   |
| GGE                | cg15810326         | 3         | Weighted median           | -0.063 | 0.091 | 0.487   |
| GGE                | cg15810326         | 3         | Inverse variance weighted | -0.085 | 0.085 | 0.320   |
| GGE                | cg15810326         | 3         | Simple mode               | -0.040 | 0.111 | 0.755   |
| GGE                | cg15810326         | 3         | Weighted mode             | -0.052 | 0.102 | 0.658   |
| GGE                | cg13974632         | 3         | MR Egger                  | 0.525  | 1.230 | 0.743   |
| GGE                | cg13974632         | 3         | Weighted median           | 0.278  | 0.127 | 0.029   |
| GGE                | cg13974632         | 3         | Inverse variance weighted | 0.224  | 0.144 | 0.120   |
| GGE                | cg13974632         | 3         | Simple mode               | 0.361  | 0.170 | 0.168   |
| GGE                | cg13974632         | 3         | Weighted mode             | 0.349  | 0.175 | 0.184   |
| GGE                | cg25557432         | 3         | MR Egger                  | -0.848 | 0.885 | 0.513   |
| GGE                | cg25557432         | 3         | Weighted median           | -0.129 | 0.173 | 0.455   |
| GGE                | cg25557432         | 3         | Inverse variance weighted | -0.046 | 0.142 | 0.746   |
| GGE                | cg25557432         | 3         | Simple mode               | -0.132 | 0.205 | 0.586   |
| GGE                | cg25557432         | 3         | Weighted mode             | -0.135 | 0.185 | 0.542   |

GGE= Genetic generalized epilepsy

**SM Table 5.** Two-sample MR analysis of the effect of febrile and vaccine-related seizures on DNA methylation.

| <b>CpG site</b> | <b>exposure</b> | <b>N of SNPs</b> | <b>Method</b>             | <b>Beta</b> | <b>SE</b> | <b>P-value</b> |
|-----------------|-----------------|------------------|---------------------------|-------------|-----------|----------------|
| cg10541930      | seizures        | 5                | Inverse variance weighted | 0.009       | 0.057     | 0.880          |
| cg10541930      | seizures        | 5                | MR Egger                  | 0.113       | 0.200     | 0.611          |
| cg10541930      | seizures        | 5                | Simple mode               | -0.040      | 0.065     | 0.573          |
| cg10541930      | seizures        | 5                | Weighted median           | -0.027      | 0.050     | 0.591          |
| cg10541930      | seizures        | 5                | Weighted mode             | -0.040      | 0.055     | 0.508          |
| cg11510269      | seizures        | 5                | Inverse variance weighted | 0.037       | 0.053     | 0.485          |
| cg11510269      | seizures        | 5                | MR Egger                  | -0.071      | 0.184     | 0.725          |
| cg11510269      | seizures        | 5                | Simple mode               | -0.001      | 0.099     | 0.995          |
| cg11510269      | seizures        | 5                | Weighted median           | 0.016       | 0.051     | 0.750          |
| cg11510269      | seizures        | 5                | Weighted mode             | 0.110       | 0.093     | 0.305          |
| cg13974632      | seizures        | 5                | Inverse variance weighted | -0.037      | 0.042     | 0.376          |
| cg13974632      | seizures        | 5                | MR Egger                  | 0.063       | 0.133     | 0.670          |
| cg13974632      | seizures        | 5                | Simple mode               | -0.009      | 0.069     | 0.902          |
| cg13974632      | seizures        | 5                | Weighted median           | -0.030      | 0.050     | 0.545          |
| cg13974632      | seizures        | 5                | Weighted mode             | -0.027      | 0.061     | 0.677          |
| cg15810326      | seizures        | 5                | Inverse variance weighted | 0.007       | 0.048     | 0.886          |
| cg15810326      | seizures        | 5                | MR Egger                  | -0.065      | 0.172     | 0.732          |
| cg15810326      | seizures        | 5                | Simple mode               | 0.122       | 0.084     | 0.219          |
| cg15810326      | seizures        | 5                | Weighted median           | 0.003       | 0.041     | 0.940          |
| cg15810326      | seizures        | 5                | Weighted mode             | -0.039      | 0.054     | 0.516          |
| cg16983916      | seizures        | 5                | Inverse variance weighted | -0.078      | 0.053     | 0.140          |
| cg16983916      | seizures        | 5                | MR Egger                  | 0.038       | 0.168     | 0.837          |
| cg16983916      | seizures        | 5                | Simple mode               | -0.062      | 0.083     | 0.495          |
| cg16983916      | seizures        | 5                | Weighted median           | -0.068      | 0.066     | 0.304          |
| cg16983916      | seizures        | 5                | Weighted mode             | -0.062      | 0.078     | 0.469          |
| cg17130518      | seizures        | 5                | Inverse variance weighted | 0.051       | 0.051     | 0.317          |
| cg17130518      | seizures        | 5                | MR Egger                  | 0.224       | 0.154     | 0.240          |
| cg17130518      | seizures        | 5                | Simple mode               | 0.108       | 0.074     | 0.218          |
| cg17130518      | seizures        | 5                | Weighted median           | 0.079       | 0.051     | 0.121          |
| cg17130518      | seizures        | 5                | Weighted mode             | 0.085       | 0.063     | 0.248          |
| cg25557432      | seizures        | 5                | Inverse variance weighted | 0.030       | 0.079     | 0.702          |
| cg25557432      | seizures        | 5                | MR Egger                  | 0.174       | 0.278     | 0.575          |
| cg25557432      | seizures        | 5                | Simple mode               | 0.064       | 0.112     | 0.596          |
| cg25557432      | seizures        | 5                | Weighted median           | 0.041       | 0.080     | 0.609          |
| cg25557432      | seizures        | 5                | Weighted mode             | 0.107       | 0.115     | 0.407          |

**SM Table 6.** Top 50 associations with rs10258194 in MR\_Base.

| Trait                                                      | Sample Size | Source    | Effect allele | Other allele | Beta      | P value  | SE       | N cases |
|------------------------------------------------------------|-------------|-----------|---------------|--------------|-----------|----------|----------|---------|
| Birth weight                                               | 193063      | Neale Lab | C             | T            | -0.014    | 1.78E-05 | 0.003    | NA      |
| Standing height                                            | 336474      | Neale Lab | C             | T            | -0.007    | 2.90E-05 | 0.002    | NA      |
| Trunk fat-free mass                                        | 331030      | Neale Lab | C             | T            | -0.006    | 3.73E-05 | 0.002    | NA      |
| Trunk predicted mass                                       | 330995      | Neale Lab | C             | T            | -0.006    | 6.5E-05  | 0.002    | NA      |
| Forced vital capacity (FVC)                                | 307638      | Neale Lab | C             | T            | -0.008    | 8.17E-05 | 0.002    | NA      |
| Whole body fat-free mass                                   | 331291      | Neale Lab | C             | T            | -0.006    | 9.34E-05 | 0.002    | NA      |
| Whole body water mass                                      | 331315      | Neale Lab | C             | T            | -0.006    | 1.65E-04 | 0.002    | NA      |
| Leg predicted mass (right)                                 | 331285      | Neale Lab | C             | T            | -0.006    | 3.26E-04 | 0.002    | NA      |
| Leg fat-free mass (right)                                  | 331285      | Neale Lab | C             | T            | -0.006    | 3.92E-04 | 0.002    | NA      |
| Forced expiratory volume in 1-second (FEV1)                | 307638      | Neale Lab | C             | T            | -0.007    | 3.93E-04 | 0.002    | NA      |
| Leg predicted mass (left)                                  | 331253      | Neale Lab | C             | T            | -0.006    | 4.35E-04 | 0.002    | NA      |
| Leg fat-free mass (left)                                   | 331258      | Neale Lab | C             | T            | -0.006    | 4.55E-04 | 0.002    | NA      |
| Basal metabolic rate                                       | 331307      | Neale Lab | C             | T            | -0.005    | 7.73E-04 | 0.002    | NA      |
| Forced vital capacity (FVC) Best measure                   | 255492      | Neale Lab | C             | T            | -0.007    | 8.61E-04 | 0.002    | NA      |
| Caudate volume                                             | 30717       | 25607358  | T             | C            | 15.907    | 8.80E-04 | 4.782    | NA      |
| Fluid intelligence score                                   | 108818      | Neale Lab | C             | T            | -0.030    | 0.001    | 0.009    | NA      |
| Qualifications: A levels/AS levels or equivalent           | 334070      | Neale Lab | C             | T            | -0.004    | 0.001    | 0.001    | 91710   |
| Birth weight                                               | 143677      | 27680694  | C             | T            | -0.012    | 0.001    | 0.004    | NA      |
| Birth weight                                               | 153781      | 27680694  | C             | T            | -0.012    | 0.002    | 0.004    | NA      |
| Arm predicted mass (right)                                 | 331216      | Neale Lab | C             | T            | -0.005    | 0.002    | 0.002    | NA      |
| Age completed full time education                          | 226899      | Neale Lab | C             | T            | -0.007    | 0.002    | 0.002    | NA      |
| Arm fat-free mass (right)                                  | 331221      | Neale Lab | C             | T            | -0.005    | 0.003    | 0.002    | NA      |
| Job involves mainly walking or standing                    | 190606      | Neale Lab | C             | T            | 0.011     | 0.003    | 0.004    | NA      |
| Qualifications: None of the above                          | 334070      | Neale Lab | C             | T            | 0.003     | 0.003    | 0.001    | 57567   |
| Qualifications: College or University degree               | 334070      | Neale Lab | C             | T            | -0.003    | 0.004    | 0.001    | 106305  |
| Putamen volume                                             | 30717       | 25607358  | T             | C            | 16.973    | 0.004    | 5.846    | NA      |
| Hearing aid user                                           | 204240      | Neale Lab | C             | T            | -0.002    | 0.004    | 0.001    | 10322   |
| Age at first live birth                                    | 123846      | Neale Lab | C             | T            | -0.011    | 0.004    | 0.004    | NA      |
| Number of live births                                      | 180952      | Neale Lab | C             | T            | 0.011     | 0.004    | 0.004    | NA      |
| Neck/shoulder pain for 3+ months                           | 75651       | Neale Lab | C             | T            | -0.006    | 0.008    | 0.002    | 52253   |
| Amyotrophic lateral sclerosis                              | 36052       | 27455348  | T             | C            | 0.009     | 0.008    | 0.003    | 12577   |
| Thalamus volume                                            | 30717       | 25607358  | T             | C            | 16.281    | 0.008    | 6.142    | NA      |
| Amyotrophic lateral sclerosis                              | 36052       | 27455348  | t             | c            | 0.046     | 0.009    | 0.018    | 12577   |
| Impedance of leg (left)                                    | 331296      | Neale Lab | C             | T            | 0.006     | 0.010    | 0.002    | NA      |
| Duration of walks                                          | 288266      | Neale Lab | C             | T            | 0.007     | 0.010    | 0.003    | NA      |
| Forced expiratory volume in 1-second (FEV1) Best measure   | 255492      | Neale Lab | C             | T            | -0.006    | 0.011    | 0.002    | NA      |
| Duration of other exercises                                | 161301      | Neale Lab | C             | T            | -0.011    | 0.012    | 0.004    | NA      |
| Arm fat-free mass (left)                                   | 331159      | Neale Lab | C             | T            | -0.004    | 0.012    | 0.002    | NA      |
| Fractured/broken bones in last 5 years                     | 335587      | Neale Lab | C             | T            | -0.002    | 0.012    | 0.001    | 32193   |
| Comparative body size at age 10                            | 331693      | Neale Lab | C             | T            | -0.004    | 0.012    | 0.002    | NA      |
| Vitamin and mineral supplements: Vitamin A                 | 335591      | Neale Lab | C             | T            | -0.001    | 0.014    | 3.31E-04 | 6173    |
| No-wear time bias adjusted acceleration standard deviation | 72615       | Neale Lab | C             | T            | 0.013     | 0.015    | 0.005    | NA      |
| Impedance of leg (right)                                   | 331301      | Neale Lab | C             | T            | 0.005     | 0.016    | 0.002    | NA      |
| Job involves heavy manual or physical work                 | 190643      | Neale Lab | C             | T            | 0.007     | 0.017    | 0.003    | NA      |
| Weight change compared with 1 year ago                     | 331803      | Neale Lab | C             | T            | 0.004     | 0.018    | 0.002    | NA      |
| Arm predicted mass (left)                                  | 331146      | Neale Lab | C             | T            | -0.004    | 0.018    | 0.002    | NA      |
| Ever taken oral contraceptive pill                         | 180749      | Neale Lab | C             | T            | 0.003     | 0.019    | 0.001    | 149365  |
| Treatment/medication code: co-amilofruse                   | 337159      | Neale Lab | C             | T            | -1.78E-04 | 0.020    | 7.63E-05 | 326     |
